# Supplementary material for: Identification and structure of an extracellular contractile injection system from the marine bacterium Algoriphagus machipongonensis
Source: PubMed Central journal article supplement (PMC8894135; doi:10.1038/s41564-022-01059-2), 2022-02-14
Supplement: 41564_2022_1059_MOESM1_ESM.pdf [file 41564_2022_1059_MOESM1_ESM.pdf]

---

**Supplementary information**

---

**Identification and structure of an  
extracellular contractile injection system  
from the marine bacterium *Algoriphagus  
machipongonensis***

---

In the format provided by the  
authors and unedited

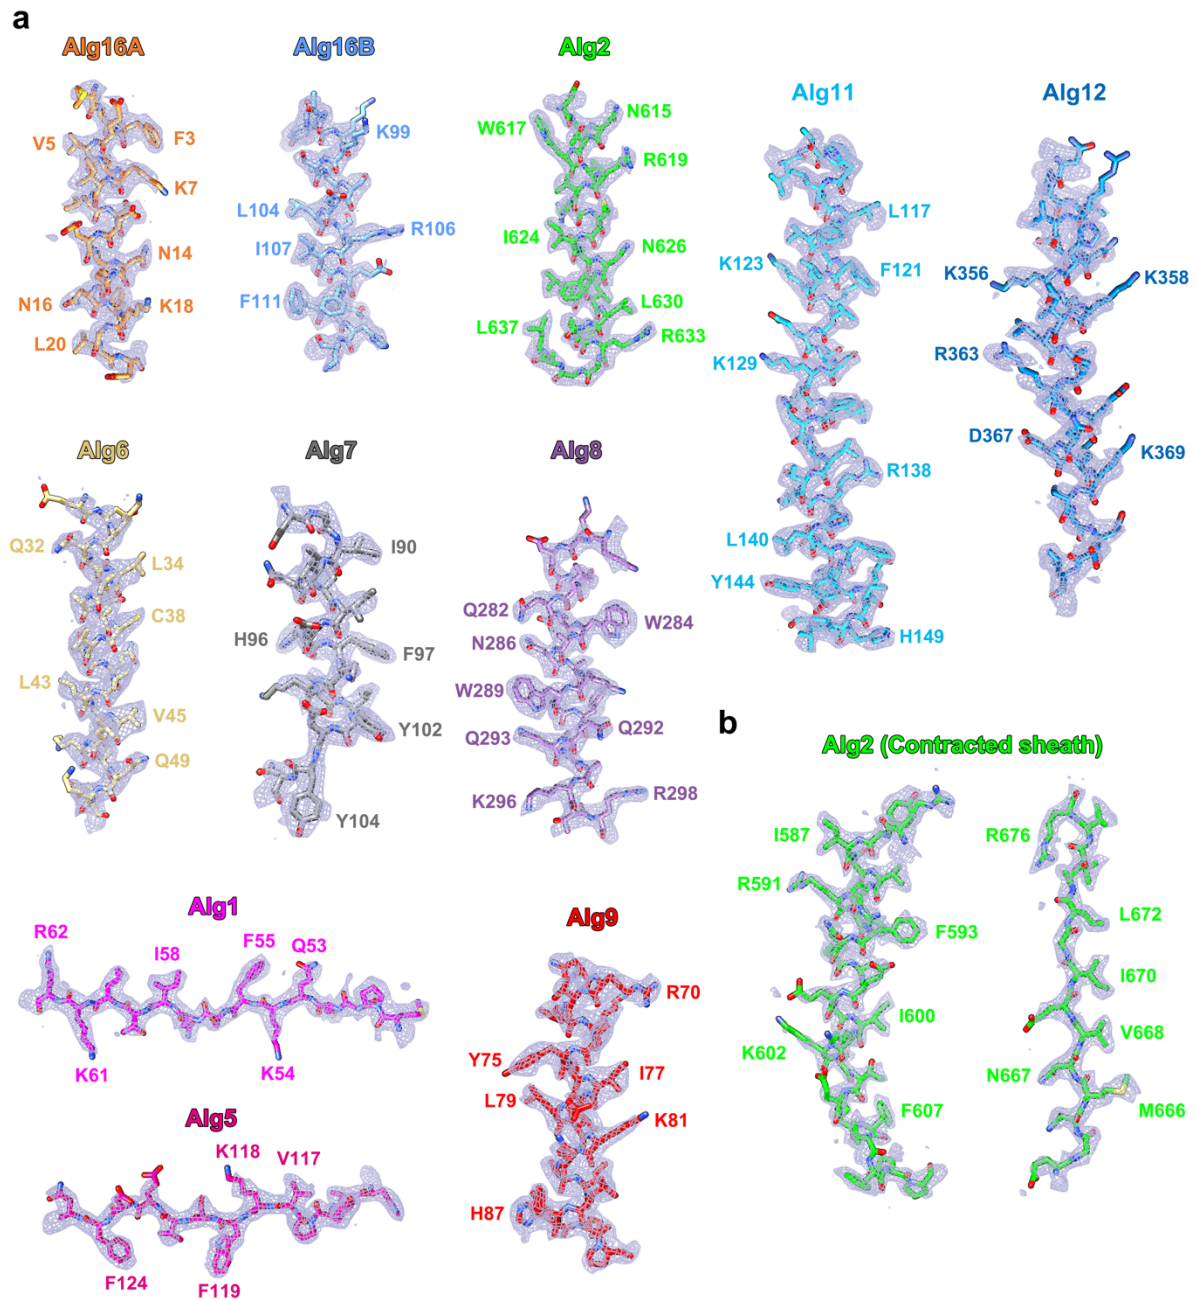

**Supplementary Figure 1. Representative densities of reconstructed EM maps**

**a:** Stick and density mesh diagrams showing the representative density maps of different structural components in the extended AlgoCIS particles. The color code for different proteins matches Fig. 1d, while the density meshes are colored grey.

**b:** Stick and density mesh diagrams showing the representative density maps of putative sheath protein (Alg2) in the contracted sheath. The color code for Alg2 matches Fig. 1d, while the density meshes are colored grey.

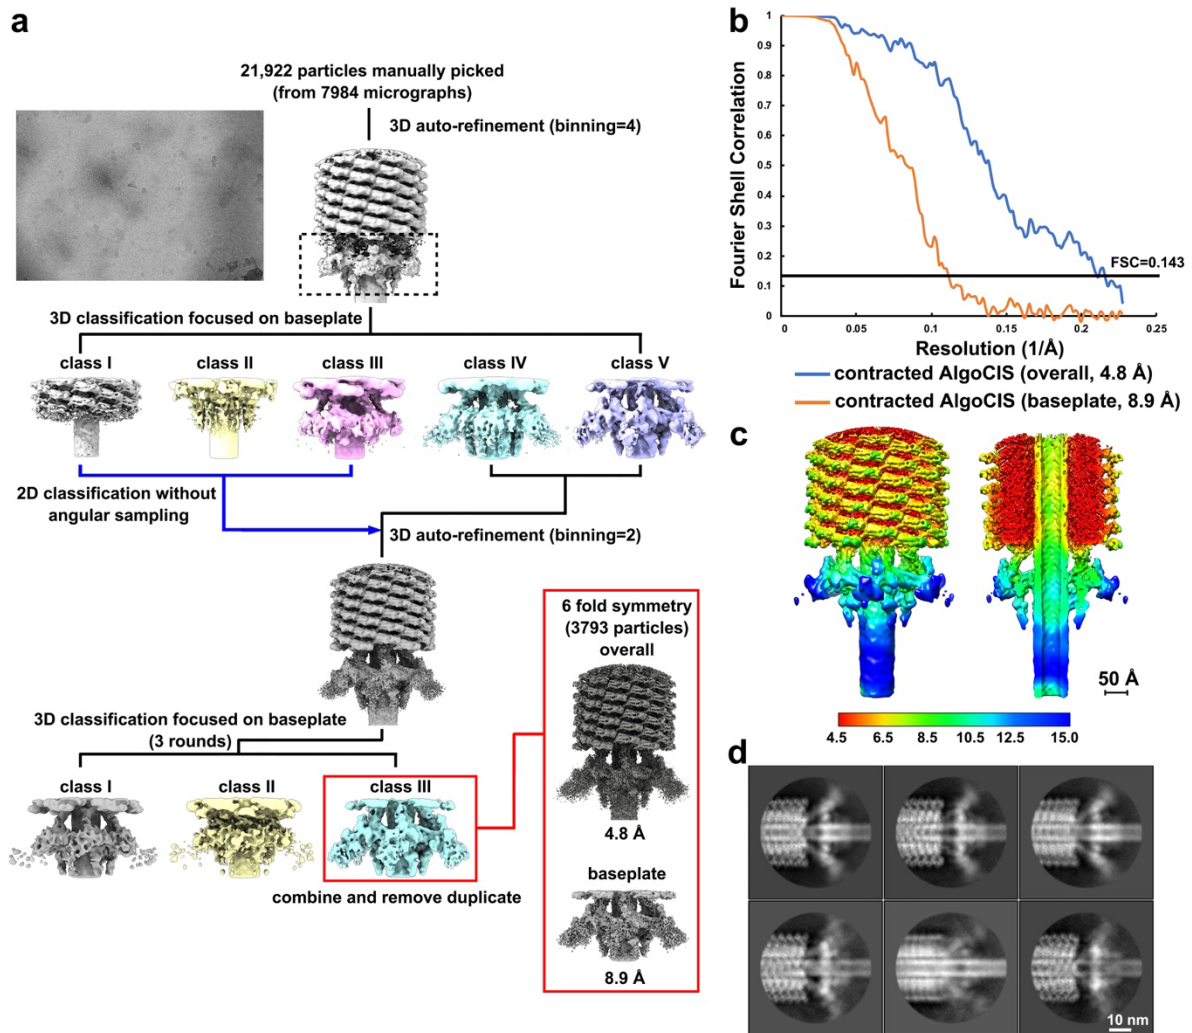

**Supplementary Figure 2. Workflow for the cryoEM structural determinations of the contracted AlgoCIS baseplate**

**a:** Flowchart for cryoEM reconstruction of the contracted AlgoCIS baseplate. See METHODS and Supplementary Table 3 for details.

**b:** Gold standard FSC curves of the contracted AlgoCIS baseplate reconstructions, including the overall structure (blue) and the focused baseplate structure (orange).

**c:** Local resolution maps of the overall structure of the contracted AlgoCIS baseplate.

**d:** 2D classification analyses showing the empty lumen of the expelled inner tube in the contracted AlgoCIS.

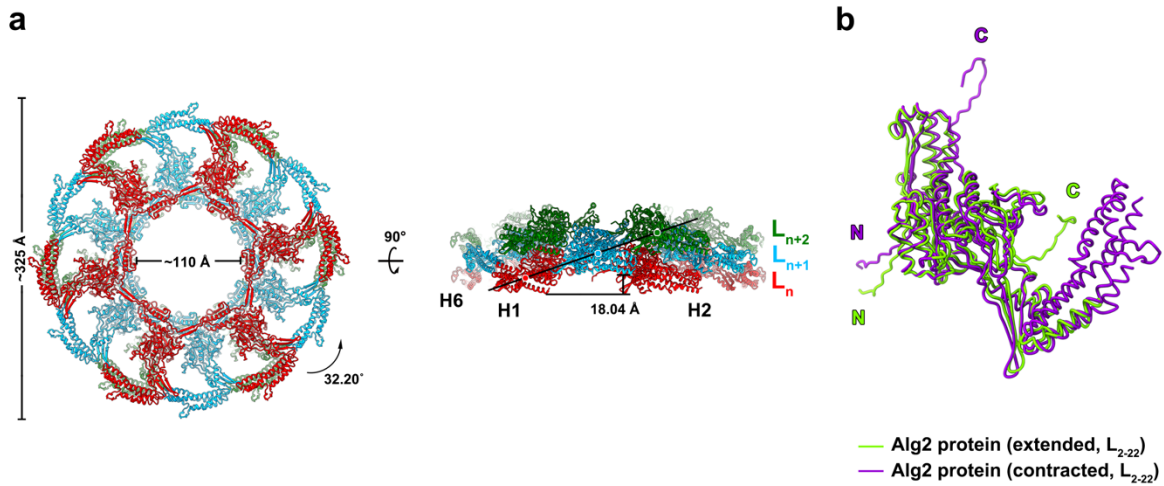

**Supplementary Figure 3. CryoEM structures of the contracted AlgoCIS sheath fragment**

**a:** Top view (left) and side view (right) of ribbon diagrams showing the contracted sheath fragment containing three sheath layers ( $L_n$ ,  $L_{n+1}$  and  $L_{n+2}$ ). The protein layers are represented in different colors. The direction of one helical strand (H1) is highlighted by a line.

**b:** Structural superpositions of sheath subunits in the extended (green) and contracted (purple) states showing that the displacements of N- and C-termini of Alg2 mediate a rigid body rotation of the subunit.

**Supplementary Table 1. AlgoCIS gene cluster**

|                        | Accession number | Protein length | Number of copies | Description                                                          | Homolog in AFP | Homolog in PVC | Homolog in T4 |
|------------------------|------------------|----------------|------------------|----------------------------------------------------------------------|----------------|----------------|---------------|
| Alg16A                 | A3HTC4           | 197            | 6                | Cap terminator                                                       | Afp16          | Pvc16          | gp15          |
| Alg16B                 | A3HTC3           | 284            | 6                | Adaptor between cap terminator and sheath-tube module sheath protein | -              | -              | -             |
| Alg2                   | A3HTC2           | 692            | 138              | inner tube protein                                                   | Afp2/3/4       | Pvc2/3/4       | gp18          |
| Alg1                   | A3HTC1           | 142            | 132              | tube initiator                                                       | Afp1           | Pvc1           | gp19          |
| Alg5                   | A3HTC0           | 147            | 6                | plugged protein at the proximal end of the inner tube lumen          | Afp5           | Pvc5           | gp54          |
| Alg6                   | A3HTB9           | 52             | 3                | tube initiator, LysM-like protein                                    | Afp6           | Pvc6           | -             |
| Alg7                   | A3HTB8           | 228            | 6                | Baseplate, VgrG-like protein                                         | Afp7           | Pvc7           | gp48/gp53     |
| Alg8                   | A3HTB7           | 581            | 3                | Baseplate, PAAR-like protein                                         | Afp8           | Pvc8           | gp5/gp27      |
| Alg10                  | A3HTB6           | 96             | 1                | Baseplate, wedge protein                                             | Afp10          | Pvc10          | gp5.4         |
| Alg9                   | A3HTB5           | 137            | 6                | Baseplate, wedge protein                                             | Afp9           | Pvc9           | gp25          |
| Alg11                  | A3HTB4           | 1050           | 6                | Baseplate, wedge protein                                             | Afp11          | Pvc11          | gp6           |
| Alg12                  | A3HTB3           | 933            | 6                | Baseplate, wedge protein                                             | Afp12          | Pvc12          | gp6/gp7       |
| Alg19                  | A3HTB2           | 1443           | unknown          | Ig-like fold protein, potential tail fiber                           | -              | -              | -             |
| Alg14                  | A3HTB1           | 537            | -                | potential tape measure protein                                       | Afp14          | Pvc14          | gp29          |
| ALPR1_12<br>695 (Cgo1) | A3HTB0           | 498            | unknown          | DUF4157 containing protein (cargo protein)                           | -              | -              | -             |
| ALPR1_12<br>690 (Cgo2) | A3HTA9           | 1228           | unknown          | DUF4157 containing protein (cargo protein)                           | -              | -              | -             |
| ALPR1_12<br>685        | A3HTA8           | 289            | -                | tetratricopeptide repeat protein                                     | -              | -              | -             |
| Alg15                  | A3HTA7           | 435            | -                | AAA superfamily ATPase                                               | Afp15          | Pvc15          | -             |



**Supplementary Table 3. Cryo-EM data statistical analysis**

|                                           | Cap    | Baseplate_C6<br>(overall) | Baseplate_C6<br>(focused<br>refined) | baseplate_C3                                  | Extended<br>sheath-tube<br>module                   | Contracted<br>sheath shell                             | Baseplate in<br>contracted<br>AlgoCIS |
|-------------------------------------------|--------|---------------------------|--------------------------------------|-----------------------------------------------|-----------------------------------------------------|--------------------------------------------------------|---------------------------------------|
| <b>Data collection and processing</b>     |        |                           |                                      |                                               |                                                     |                                                        |                                       |
| Magnification                             |        |                           |                                      | 81,000                                        |                                                     |                                                        |                                       |
| Voltage (kV)                              |        |                           |                                      | 300                                           |                                                     |                                                        |                                       |
| Electron exposure (e <sup>-</sup> /Å)     |        |                           |                                      | 60 e <sup>-</sup> /dose weighting (K3 camera) |                                                     |                                                        |                                       |
| Defocus range (μm)                        |        |                           |                                      | 1.0-3.0                                       |                                                     |                                                        |                                       |
| Pixel size (Å/pixel)                      |        |                           |                                      | 1.1                                           |                                                     |                                                        | 2.2<br>(binning=2)                    |
| Symmetry imposed                          | C6     | C6                        | C6                                   | C3                                            | C6 + helical<br>(twist = 20.54°,<br>rise = 40.80 Å) | C6 + helical<br>(twist =<br>32.20°, rise =<br>18.04 Å) | C6                                    |
| Initial particles (No.)                   | 128473 | 128473                    | 128473                               | 128473                                        | 856113                                              | 157909                                                 | 21922                                 |
| Final particles (No.)                     | 65059  | 82969                     | 30211                                | 82969                                         | 225305                                              | 92922                                                  | 3793                                  |
| Map resolution                            | 2.5    | 2.7                       | 2.9                                  | 2.8                                           | 2.4                                                 | 2.5                                                    | 4.8 (overall)<br>8.9<br>(baseplate)   |
| FSC threshold                             | 0.143  | 0.143                     | 0.143                                | 0.143                                         | 0.143                                               | 0.143                                                  | 0.143                                 |
| <b>Refinement</b>                         |        |                           |                                      |                                               |                                                     |                                                        |                                       |
| Map sharpening B factor (Å <sup>2</sup> ) | -40    | -52                       | -33                                  | -56                                           | -60                                                 | -64                                                    | 15 (overall)<br>-22<br>(baseplate)    |
| Model composition                         |        |                           |                                      |                                               | (three layers)                                      | (three layers)                                         |                                       |
| Non-hydrogen atoms                        | 67800  | 135188                    |                                      | 149562                                        | 92718                                               | 91008                                                  | -                                     |
| Protein residues                          | 8508   | 17155                     |                                      | 19014                                         | 11736                                               | 11808                                                  | -                                     |
| Chains                                    | 30     | 42                        |                                      | 48                                            | 36                                                  | 18                                                     | -                                     |
| R.M.S deviations                          |        |                           |                                      |                                               |                                                     |                                                        |                                       |
| Bond length (Å)                           | 0.015  | 0.014                     |                                      | 0.015                                         | 0.015                                               | 0.005                                                  | -                                     |
| Bond angles (°)                           | 1.549  | 1.514                     |                                      | 1.582                                         | 1.674                                               | 0.875                                                  | -                                     |
| Validation                                |        |                           |                                      |                                               |                                                     |                                                        |                                       |
| MolProbity score                          | 1.21   | 1.23                      |                                      | 1.31                                          | 1.20                                                | 1.02                                                   | -                                     |
| Clashscore                                | 4.30   | 3.55                      |                                      | 4.57                                          | 4.17                                                | 1.82                                                   | -                                     |
| Poor rotamer (%)                          | 0.00   | 0.00                      |                                      | 0.00                                          | 0.00                                                | 0.00                                                   | -                                     |
| Ramachandran plot                         |        |                           |                                      |                                               |                                                     |                                                        |                                       |
| Favored (%)                               | 98.03  | 97.58                     |                                      | 97.62                                         | 98.61                                               | 97.61                                                  | -                                     |
| Allowed (%)                               | 1.97   | 2.42                      |                                      | 2.38                                          | 1.39                                                | 2.39                                                   | -                                     |
| Outlier (%)                               | 0.00   | 0.00                      |                                      | 0.00                                          | 0.00                                                | 0.00                                                   | -                                     |
| Masked CC                                 | 0.85   | 0.80                      | 0.82                                 | 0.78                                          | 0.81                                                | 0.86                                                   | -                                     |

**Supplementary Table 4. List of primers to generate different bacterial mutants**

|                      |                       |                                                            |
|----------------------|-----------------------|------------------------------------------------------------|
| ΔAlg16B              | ΔAlg16B_dA            | 5'-<br>GTAAAAAGGATCGATCCTCTAGATGCATTCGTACAAAGCAAAAG-<br>3' |
|                      | ΔAlg16B_dB            | 5'-GTTGCCATAGTAAAAAAGGTAAATTATAGCGTTTCGTAGT-3'             |
|                      | ΔAlg16B_dC            | 5'-ACTACGAAACGCTATAATTTACCTTTTTACTATGGCAAC-3'              |
|                      | ΔAlg16B_dD            | 5'-CGTGAATTCAAAGGGAGAGCTCAGGAAGCAATGGCTGAATTG-3'           |
|                      | Alg16B_SeqF           | 5'-GGGAAGAGGTCACGATGAAA-3'                                 |
|                      | Alg16B_SeqR           | 5'-ATCGAGCAACGATGAAATCC-3'                                 |
| ΔAlg2                | ΔAlg2_dA              | 5'-GTAAAAAGGATCGATCCTCTAGATGGGGGACTTTAGGAGGAAG-<br>3'      |
|                      | ΔAlg2_dB              | 5'-GTCTAGGTCAAGCTGCTTTAAGTAAAAAAGGTTTAAATGA-3'             |
|                      | ΔAlg2_dC              | 5'-TCATTTAAACCTTTTTACTTAAAGCAGCTTGACCTAGAC-3'              |
|                      | ΔAlg2_dD              | 5'-CGTGAATTCAAAGGGAGAGCTCACACATTGAGCAACGAGCTG-3'           |
|                      | Alg2_SeqF             | 5'-AGGTGGTGTATTGGGGATCA-3'                                 |
|                      | Alg2_SeqR             | 5'-TTCCCGGCATTTTTATTTTG-3'                                 |
| ΔAlg6                | ΔAlg6_dA              | 5'-GTAAAAAGGATCGATCCTCTAGATTGGAGGTCTGCTGCTTTTT-3'          |
|                      | ΔAlg6_dB              | 5'-CCAGTTTACCTTCACTCATGACCAGACAATCGTTTTGAAATAG-3'          |
|                      | ΔAlg6_dC              | 5'-CTATTTCAAACGATTGTCTGGTCAAGTGAAGGTAACTGG-3'              |
|                      | ΔAlg6_dD              | 5'-CGTGAATTCAAAGGGAGAGCTCTCGTGACTCCACGATTAGGA-3'           |
|                      | Alg6_SeqF             | 5'-TTTGCAGAGGGAGGAGAAAA-3'                                 |
|                      | Alg6_SeqR             | 5'-GTCGTTGCCATGGCTCTAAT-3'                                 |
| pCHIP3<br>backbone   | pCHIP3_SeqF<br>1      | 5'-TTCTGTTGCATGGGCATAAA-3'                                 |
|                      | pCHIP3_SeqR<br>1      | 5'-CCAACCCATCCATATGCTTC-3'                                 |
|                      | pCHIP3_SeqR<br>2      | 5'-CGTGAATTCAAAGGGAGAGC-3'                                 |
| AlgoCIS <sup>-</sup> | BamHI_Algo_<br>CIS_F  | 5'-ATATATGGATCCTTTCTTTTCATGCATAGG-3'                       |
|                      | Algo_CIS_F            | 5'-TCATTTAAACCTTTTTACTTAAAGCAGCTTGACCTA-3'                 |
|                      | Algo_CIS_R            | 5'-TAGGTCAAGCTGCTTTAAGTAAAAAAGGTTTAAATGA-3'                |
|                      | PstI_Algo_CI<br>S R   | 5'-ATATATCTGCAGTCGTATTGAACTAGTTCA-3'                       |
| Null<br>mutant       | BamHI_Algo_<br>null_F | 5'-ATATATGGATCCTGCTTCGATCTGCGCTTC-3'                       |
|                      | PstI_Algo_nul<br>l R  | 5'-ATATATCTGCAGCTCAAAAAAGCAGAAGCTCAG-3'                    |
